# Supplementary material for: PRMT1 Deficiency in Mouse Juvenile Heart Induces Dilated Cardiomyopathy and Reveals Cryptic Alternative Splicing Products
Source: PubMed Central journal article supplement — iScience. 2018 Oct 2;8:200–13. doi: 10.1016/j.isci.2018.09.023 (PMC6197527; doi:10.1016/j.isci.2018.09.023), 2018-10-02
Supplement: mmc1.pdf [file mmc1.pdf]

**ISCI, Volume 8**

**Supplemental Information**

**PRMT1 Deficiency in Mouse Juvenile Heart  
Induces Dilated Cardiomyopathy and Reveals  
Cryptic Alternative Splicing Products**

**Kazuya Murata, Weizhe Lu, Misuzu Hashimoto, Natsumi Ono, Masafumi Muratani, Kana Nishikata, Jun-Dal Kim, Shizufumi Ebihara, Junji Ishida, and Akiyoshi Fukamizu**

## Supplemental Figures and Tables

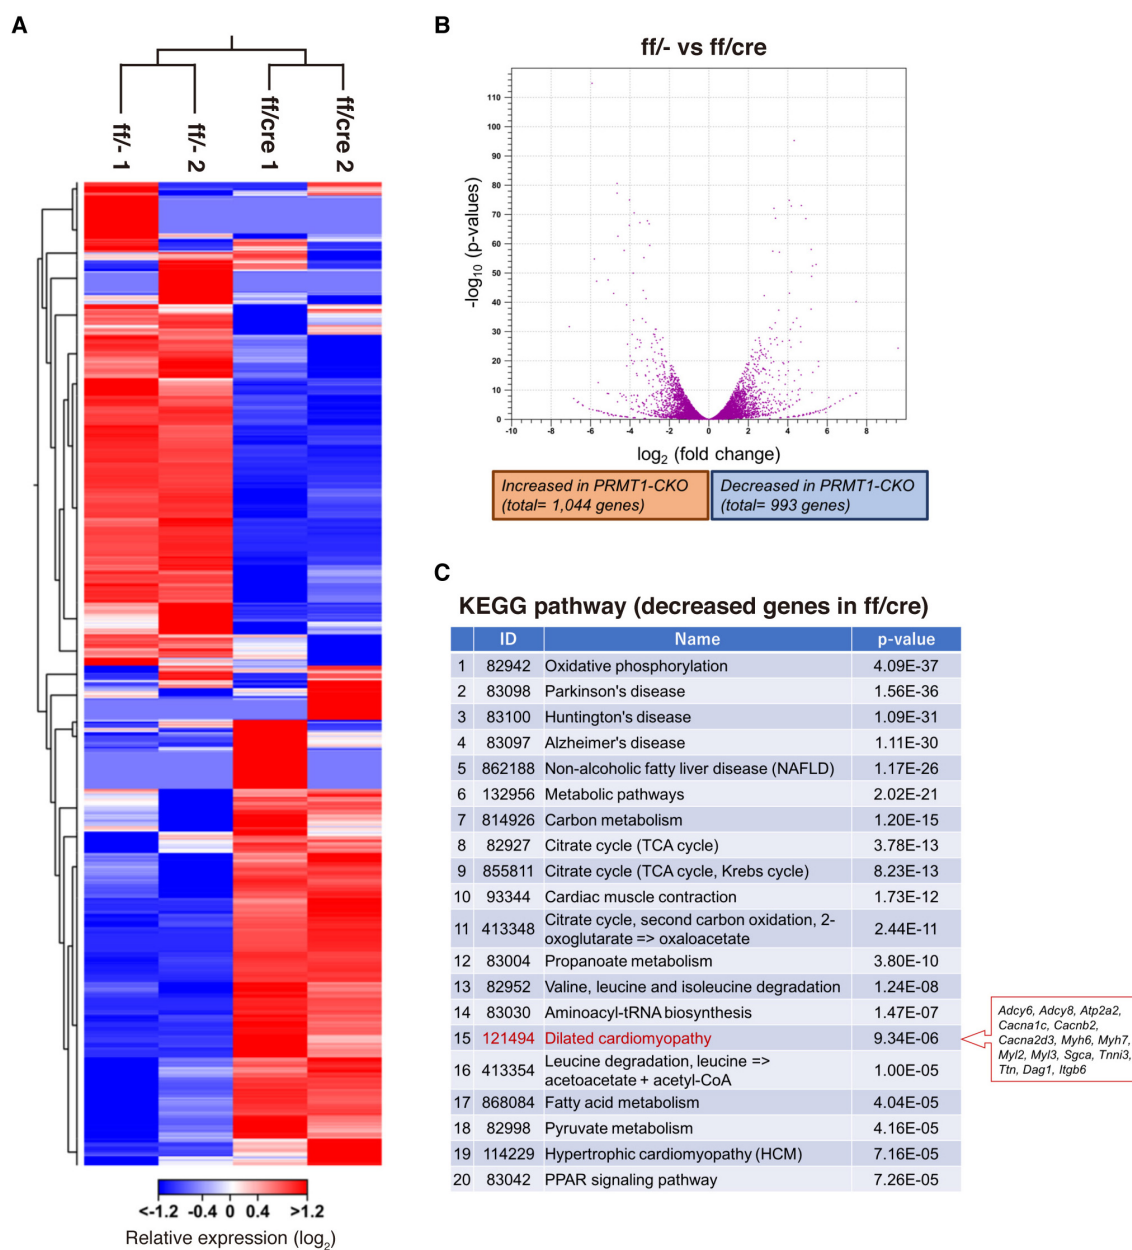

**Figure S1 (related to Figure 3). Gene expression profile of RNA-Seq data**

(A and B) A hierarchical clustering and a volcano plot based on the 2,037 differentially expressed genes between control and PRMT1-cKO group (adjusted FDR  $P$  value < 0.05). (C) Functional enrichment analysis of 993 downregulated genes in PRMT1-cKO mice. The top 20 enriched pathways are shown in the table. A list of matched genes with DCM-related gene sets in the box insert. See also Table S1.

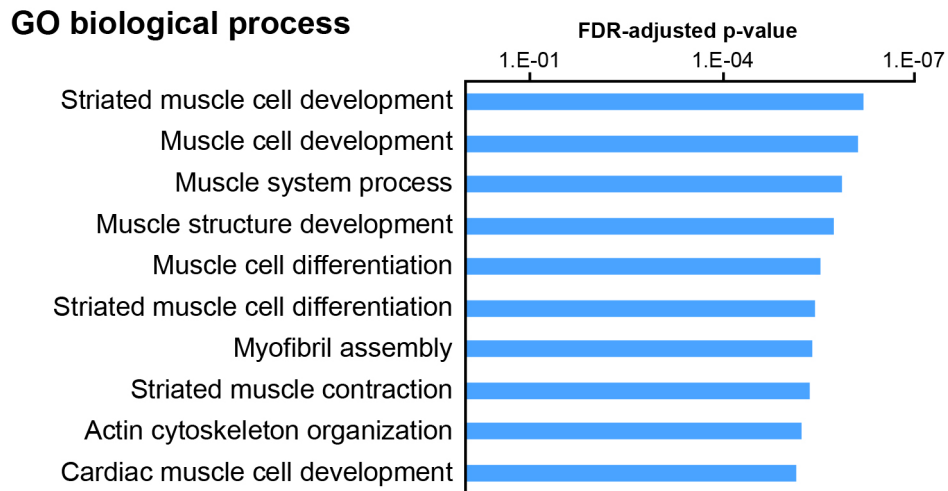

**Figure S2 (related to Figure 4). Gene ontology (GO) analysis of alternatively expressed isoforms between control and PRMT1-cKO mice**

GO analysis of 74 genes was performed using the PANTHER web tool (Mi et al., 2013). The top 10 enriched GO terms are shown in the graph.

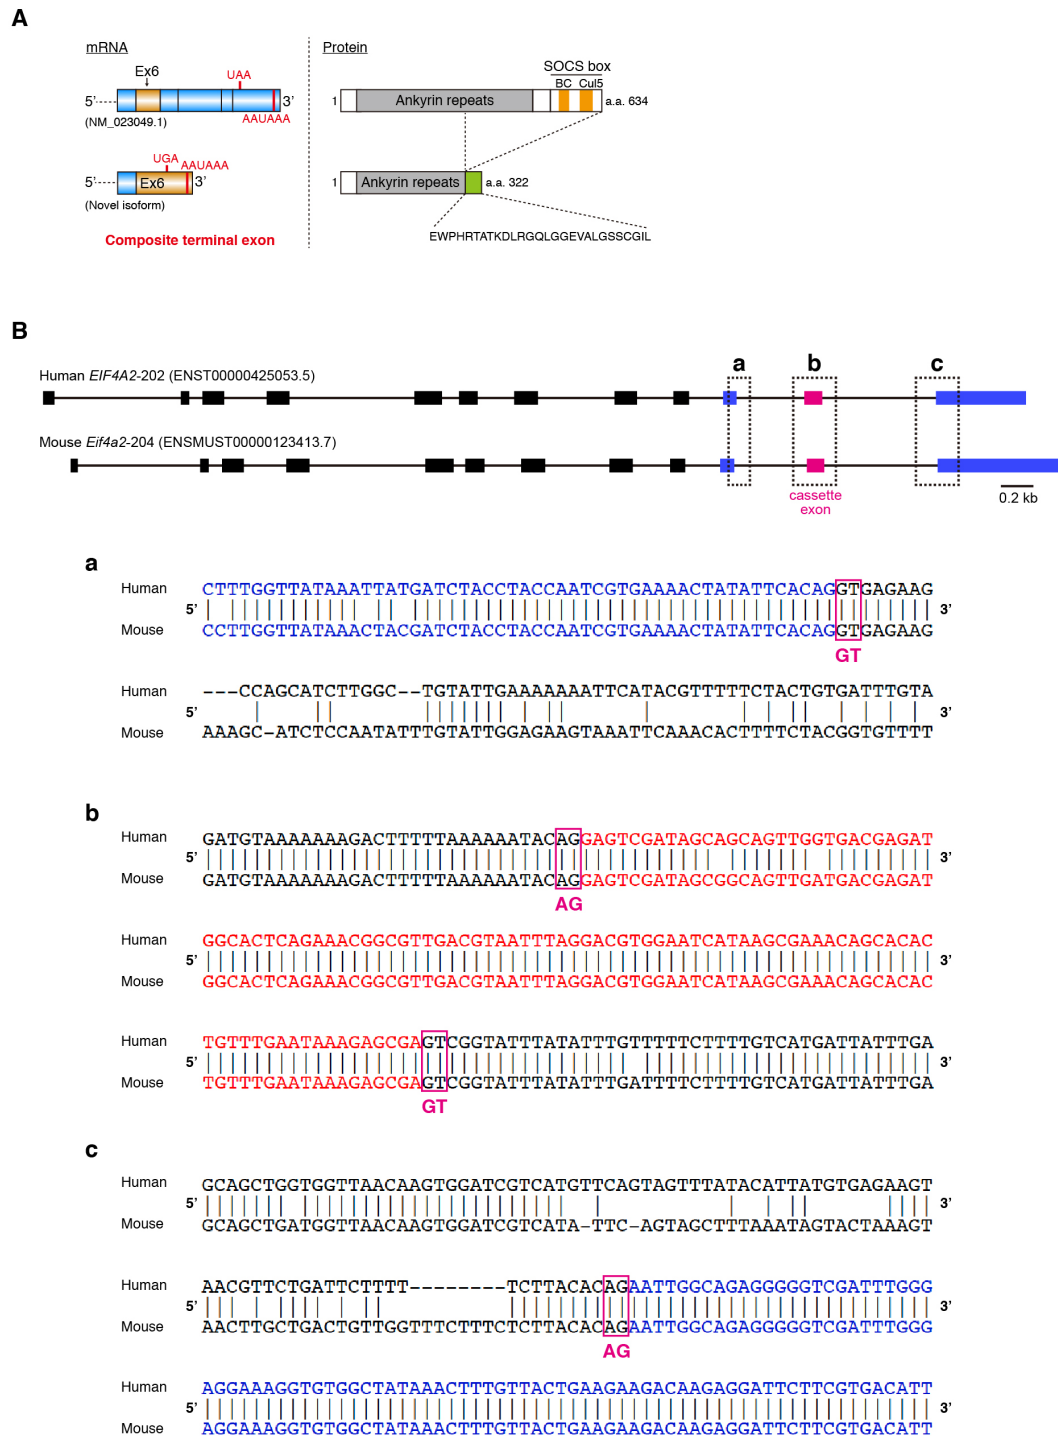

**Figure S3 (related to Figure 4). Schematic diagrams of *Asb2* mRNA/protein and *Eif4a2* gene**

(A) 3' side of *Asb2* mRNA and domain structure of ASB2 protein. The extended exon 6 contains a stop codon and a putative poly(A) signal. (B) Structures of human and mouse *Eif4a2* transcripts. (a-c) DNA sequences surrounding splice donor and acceptor sites.

| Alternatively spliced genes | Animal models             | Reference                                   |                                    |
|-----------------------------|---------------------------|---------------------------------------------|------------------------------------|
| <i>Tmed2, Snap23</i>        | CELF1-overexpressing mice | <i>Nat. Commun.</i> 2014                    | doi: 10.1038/ncomms4603.           |
| <i>Mef2a</i>                | SRSF10-KO mice            | <i>Cell Rep.</i> 2015                       | doi: 10.1016/j.celrep.2015.10.038. |
|                             | RBFOX2-KO mice            | <i>Cell Rep.</i> 2015                       | doi: 10.1016/j.celrep.2015.02.013. |
| <i>Ktn1</i>                 | CELF1-KO mice             | <i>Sci. Rep.</i> 2016                       | doi: 10.1038/srep35550.            |
|                             | rbfox1-KD zebrafish       | <i>J. Cell Sci.</i> 2015                    | doi: 10.1242/jcs.166850.           |
| <i>Lmo7</i>                 | RBM20-KO rats             | <i>J. Clin. Invest.</i> 2014                | doi: 10.1172/JCI174523.            |
| <i>Srobs1</i>               | MBNL1-KO mice             | <i>Sci. Rep.</i> 2015                       | doi: 10.1038/srep09042.            |
|                             | RBFOX2-KO mice            | <i>Cell Rep.</i> 2015                       | doi: 10.1016/j.celrep.2015.02.013. |
|                             | RBM20-KO rats             | <i>Nat. Med.</i> 2012                       | doi: 10.1038/nm.2693.              |
| <i>Ttn</i>                  | RBM20-KO rats             | <i>Nat. Med.</i> 2012                       | doi: 10.1038/nm.2693.              |
|                             | hnRNPU-KO mice            | <i>Proc. Natl. Acad. Sci. U. S. A.</i> 2015 | doi: 10.1073/pnas.1508461112.      |

**Table S2 (related to Figure 3). Summary of known cardiac alternative splicing events that were investigated as illustrated in Figure 3.**

| Feature ID      | P-value  | Relative RPKM | Relative RPKM | WT Means | Relative RPKM | Relative RPKM | KO Means | Ratio     |
|-----------------|----------|---------------|---------------|----------|---------------|---------------|----------|-----------|
| Splan1_11       | 7.86E-03 | 3.41E-04      | 1.84E-04      | 2.16E-03 | 0.28          | 0.21          | 4.63     | 0.00107   |
| Acp5_1          | 5.00E-04 | 0.04          | 0             | 4.41E-03 | 1             | 1             | 7.02     | 0.02000   |
| Ppfbp1_3        | 4.95E-04 | 0.03          | 3.17E-03      | 0.08     | 0.57          | 0.83          | 6.87     | 0.02369   |
| Ndrp4_6         | 9.88E-04 | 6.17E-03      | 0             | 0.07     | 0.1           | 0.13          | 6.29     | 0.02683   |
| Fbxo40_3        | 2.81E-04 | 0.02          | 0.02          | 0.28     | 0.21          | 0.42          | 8.87     | 0.06349   |
| Fam198b_1       | 0.04     | 0.09          | 0             | 0.14     | 0.53          | 0.67          | 4.8      | 0.07500   |
| Smtd1_2         | 6.43E-03 | 0             | 0.05          | 0.47     | 0.19          | 0.56          | 6.37     | 0.08109   |
| Nrap_5          | 1.52E-03 | 0.05          | 0.09          | 0.89     | 0.71          | 1             | 10.33    | 0.08187   |
| Tnnt2_4         | 0.04     | 1.18E-03      | 0             | 0.3      | 5.25E-03      | 7.28E-03      | 4.29     | 0.09417   |
| 1500017E21Rik_4 | 0.02     | 0.06          | 0.12          | 0.1      | 0.7           | 1             | 4.03     | 0.10588   |
| Tpm1_12         | 5.94E-13 | 0.01          | 9.71E-03      | 14.67    | 0.1           | 0.07          | 108.86   | 0.11594   |
| Gen_4           | 4.53E-03 | 2.51E-03      | 9.42E-03      | 0.92     | 0.03          | 0.06          | 8.97     | 0.13256   |
| Atpirf1_1       | 6.61E-05 | 0             | 0.18          | 3.1      | 0.34          | 1             | 26.8     | 0.13433   |
| Nptn_4          | 7.57E-03 | 0.16          | 0.01          | 0.87     | 0.9           | 0.29          | 7.26     | 0.14286   |
| Synpo2l_3       | 9.91E-04 | 0.16          | 0.16          | 0.36     | 1             | 1             | 8.01     | 0.16000   |
| Ttn_14          | 1.36E-03 | 0.13          | 0.15          | 14.01    | 0.76          | 0.95          | 40.95    | 0.16374   |
| Clu_3           | 5.51E-07 | 0.01          | 4.87E-03      | 0.56     | 0.03          | 0.06          | 16.15    | 0.16522   |
| Cxcl12_1        | 0.05     | 0.16          | 0.2           | 1.62     | 1             | 1             | 7.54     | 0.18000   |
| Vmp1_2          | 0.04     | 0.08          | 0.12          | 0.34     | 0.59          | 0.5           | 4.31     | 0.18349   |
| Fhl1_2          | 1.34E-10 | 0.19          | 0.18          | 1.45     | 1             | 1             | 29.04    | 0.18500   |
| H19_5           | 0.02     | 0.05          | 5.56E-03      | 0.06     | 0.15          | 0.14          | 4        | 0.19159   |
| Pkm_1           | 3.25E-05 | 0.04          | 0.05          | 3.24     | 0.28          | 0.18          | 21.89    | 0.19565   |
| Pdlim5_5        | 7.81E-03 | 0.05          | 0.04          | 3.88     | 0.23          | 0.22          | 15.37    | 0.20000   |
| Tnnt2_1         | 0.04     | 3.55E-03      | 5.55E-04      | 1.07     | 9.82E-03      | 0.01          | 6.96     | 0.20711   |
| Splan1_9        | 0.01     | 0.12          | 0.04          | 0.68     | 0.47          | 0.26          | 6.74     | 0.21918   |
| Casq2_1         | 0.01     | 4.13E-03      | 0.05          | 2.16     | 0.15          | 0.09          | 10.31    | 0.22554   |
| Popdc2_1        | 0.02     | 0.08          | 0.06          | 2.62     | 0.21          | 0.29          | 11.48    | 0.28000   |
| Sorbs2_7        | 2.27E-04 | 0.08          | 0.09          | 0.68     | 0.3           | 0.28          | 11.05    | 0.29310   |
| Rhod_2          | 0.02     | 0.29          | 0.37          | 0.19     | 1             | 1             | 5.41     | 0.33000   |
| Lamp2_3         | 2.82E-04 | 0.33          | 0.34          | 5.13     | 1             | 1             | 22.74    | 0.33500   |
| Postn_5         | 6.56E-09 | 0.09          | 0.31          | 0.75     | 0.64          | 0.54          | 22.36    | 0.33898   |
| Ldb3_5          | 2.77E-03 | 0.31          | 0.37          | 18.39    | 1             | 1             | 11.19    | 0.34000   |
| Strn_3          | 0.04     | 0.1           | 0.32          | 0.34     | 0.6           | 0.62          | 4.62     | 0.34426   |
| Fez2_1          | 0.02     | 0.33          | 0.35          | 2.42     | 1             | 1             | 10.51    | 0.34500   |
| Aldoa_9         | 4.99E-11 | 0.16          | 0.24          | 44.49    | 0.52          | 0.55          | 136.5    | 0.37383   |
| Ptn11_2         | 1.36E-03 | 0.36          | 0.29          | 2.59     | 0.83          | 0.76          | 14.73    | 0.40881   |
| Myl4_7          | 9.86E-03 | 0.17          | 0             | 8.84     | 0.2           | 0.21          | 32.27    | 0.41463   |
| Mybpc3_1        | 0.02     | 7.13E-03      | 6.19E-03      | 1.27     | 0.02          | 0.01          | 7.54     | 0.44400   |
| Ctsd_4          | 2.21E-03 | 0.05          | 0.04          | 2.83     | 0.14          | 0.05          | 17.84    | 0.47368   |
| P4hb_1          | 0.02     | 0.05          | 0.08          | 1.17     | 0.18          | 0.09          | 7.36     | 0.48148   |
| Tnnt2_7         | 8.29E-03 | 0.11          | 0.05          | 43.03    | 0.17          | 0.16          | 114.35   | 0.48485   |
| Rtn4_6          | 3.46E-03 | 0             | 0.06          | 0.15     | 0.07          | 0.05          | 7.05     | 0.50000   |
| Tfpi_10         | 0.01     | 0.37          | 0.33          | 1.66     | 0.76          | 0.64          | 8.93     | 0.50000   |
| Ccdc141_9       | 7.63E-03 | 1             | 0.95          | 6.42     | 0.63          | 0.34          | 1.93     | 2.01031   |
| Srtn1_5         | 0.03     | 1             | 1             | 2.78     | 0.48          | 0.51          | 0.39     | 2.02020   |
| Coro6_6         | 7.86E-03 | 0.33          | 0.36          | 3.59     | 0             | 0.34          | 0.32     | 2.02941   |
| Hint2_1         | 0.04     | 0.44          | 0.35          | 3.46     | 0.17          | 0.2           | 0.87     | 2.13514   |
| Osgepl1_1       | 0.04     | 1             | 0.92          | 3.38     | 0.68          | 0.21          | 0.76     | 2.15730   |
| Kcnj3_1         | 0.02     | 1             | 1             | 2.9      | 0.54          | 0.34          | 0.28     | 2.27273   |
| Ivms1abp_2      | 2.80E-03 | 0.21          | 0.19          | 18.34    | 0.06          | 0.11          | 10.89    | 2.35294   |
| Adck3_11        | 0.02     | 0.07          | 0.12          | 3.15     | 0             | 0.08          | 0.22     | 2.37500   |
| Mrlp1_2         | 0.04     | 0.2           | 0.26          | 3.38     | 0.13          | 0.06          | 0.77     | 2.42105   |
| Echs1_5         | 0.03     | 0.05          | 0.05          | 2.49     | 0.02          | 0.02          | 0.37     | 2.50000   |
| Oxct1_3         | 8.95E-06 | 0.12          | 0.16          | 12.2     | 0.09          | 0.02          | 2.28     | 2.54545   |
| Bsq_1           | 8.32E-06 | 0.31          | 0.35          | 43.58    | 0.04          | 0.21          | 12.22    | 2.64000   |
| Ctcf_2          | 0.01     | 0.19          | 0.18          | 2.09     | 0.07          | 0.07          | 10.39    | 2.64286   |
| Myl2_8          | 7.47E-03 | 2.38E-03      | 1.59E-03      | 5.89     | 2.67E-04      | 1.18E-03      | 1.12     | 2.74361   |
| Obscn_6         | 1.52E-03 | 1             | 1             | 7.84     | 0.53          | 0.18          | 2.18     | 2.81690   |
| Myl2_12         | 1.25E-04 | 3.32E-03      | 2.78E-03      | 9.03     | 5.44E-04      | 1.58E-03      | 1.66     | 2.87194   |
| Cdh13_3         | 0.04     | 0.27          | 0.38          | 3.72     | 0.16          | 0.06          | 0.78     | 2.95455   |
| Nudt7_5         | 6.41E-03 | 0.34          | 0.83          | 4.94     | 0.35          | 0.03          | 0.52     | 3.07895   |
| Ndufs1_2        | 1.24E-04 | 0.19          | 0.18          | 8.86     | 0.06          | 0.06          | 1.22     | 3.08333   |
| Ttn_19          | 3.71E-05 | 0.1           | 0.1           | 9.84     | 0.03          | 0.03          | 1.41     | 3.33333   |
| Ttn_6           | 3.45E-03 | 0.05          | 0.05          | 5.17     | 0.01          | 0.02          | 0.85     | 3.33333   |
| Lmo7_16         | 2.65E-03 | 0.57          | 0.68          | 8.32     | 0.19          | 0.18          | 2.63     | 3.37838   |
| Mtch2_6         | 0.01     | 0.33          | 0.46          | 5.17     | 0.17          | 0.06          | 1.21     | 3.43478   |
| Chpt1_5         | 4.45E-07 | 0.92          | 1             | 14.35    | 0.35          | 0.19          | 2.25     | 3.55556   |
| Asb2_2          | 1.51E-05 | 1             | 1             | 14.6     | 0.35          | 0.2           | 3.89     | 3.63636   |
| Eif4a2_17       | 5.02E-05 | 0.64          | 0.8           | 19.4     | 0.23          | 0.16          | 8.44     | 3.69231   |
| D4Wsu53e_3      | 0.02     | 0.29          | 0.19          | 3.83     | 0.07          | 0.05          | 0.76     | 4.00000   |
| Ech1_5          | 7.92E-09 | 0.06          | 0.07          | 12.41    | 8.63E-03      | 0.02          | 0.52     | 4.54069   |
| Narf_2          | 0.04     | 0.39          | 0.39          | 3.57     | 0.05          | 0.12          | 0.5      | 4.58824   |
| Smtd1_3         | 5.01E-04 | 0.48          | 0.52          | 8.9      | 0.17          | 0             | 1.81     | 5.88235   |
| Slc25a39_14     | 0.04     | 0.79          | 0.78          | 3.32     | 0.06          | 0.18          | 0.97     | 6.54167   |
| Tll1_4          | 7.86E-03 | 1             | 1             | 3.74     | 0.29          | 0             | 0.2      | 6.89655   |
| Sgca_2          | 3.45E-03 | 0.73          | 1             | 5.41     | 0.07          | 0.17          | 0.73     | 7.20833   |
| Gccpd1_13       | 0.03     | 0.09          | 0.14          | 2.65     | 0.02          | 0.01          | 0.2      | 7.66667   |
| Obscn_5         | 1.97E-03 | 0.5           | 0.59          | 4.26     | 0.05          | 0.06          | 0.36     | 9.90909   |
| Acot7_6         | 0.02     | 1             | 0.43          | 3.12     | 0.08          | 0.04          | 0.27     | 11.91667  |
| Mf10_10         | 3.94E-03 | 0.52          | 1             | 4.19     | 0.05          | 3.25E-03      | 0.18     | 28.54460  |
| Ifit1_2         | 3.93E-03 | 1             | 1             | 3.88     | 0             | 0.02          | 66.66667 |           |
| Ndufv1_1        | 0.03     | 0.02          | 0.06          | 2.67     | 0             | 4.97E-04      | 9.19E-03 | 160.96579 |

**Table S3 (related to Figure 4). Candidate genes exhibiting aberrant alternative splicing in PRMT1-cKO mice.**

## Transparent Methods

### Animal experiments

PRMT1<sup>KI</sup> mice that carry *Prmt1*<sup>tm1a(EUCOMM)Wtsi</sup> allele and *Prmt1*<sup>flx/flx</sup> mice were obtained and generated as previously described (Hashimoto et al., 2016). To create PRMT1-cKO mice, *Prmt1*<sup>flx/flx</sup> mice were mated with  $\alpha$ MHC-cre transgenic mice (strain name: B6.FVB-Tg(Myh6-cre)2182Mds/J, stock number: 011038, The Jackson Laboratory). C57BL/6J mice were purchased from CLEA Japan for isolation of primary cardiomyocytes and non-myocytes. Genotype of PRMT1-cKO mice was determined by PCR and agarose gel electrophoresis. Briefly, a small piece of tail was removed from 10-14-day-old mice, and direct PCR was performed using HelixAmp Direct PCR 3G (NanoHelix #DPR200) in accordance with the manufacturer's instructions. The primer sequences were as follows: *Prmt1* (5'-GTGCTTGCCATACAAGAGATCC-3' and 5'-GTGAAACATGGAGTTGCGGTAT-3');  $\alpha$ MHC-cre transgene (5'-ATGACAGACAGATCCCTCCTATCTCC-3' and 5'-CTCATCACTCGTTGCATCATCGAC-3'). To assess cardiac contractile function, echocardiography was performed as described previously (Murata et al., 2013). Male mice were used for all experiments except X-gal staining.

All animal experiments were performed in a humane manner and approved by the Institutional Animal Experiment Committee of the University of Tsukuba. Experiments were conducted in accordance with the Regulations for Animal Experiments of the University of Tsukuba and the Fundamental Guidelines for Proper Conduct of Animal Experiments and Related Activities in Academic Research Institutions under the jurisdiction of the Ministry of Education, Culture, Sports, Science and Technology of Japan.

### Histological analysis

Hearts were embedded in paraffin and sectioned as previously described (Murata et al., 2013). Deparaffinized cardiac sections (5 and 3  $\mu$ m thick) were stained with hematoxylin-eosin (HE) and Masson's trichrome reagents. Images were obtained using a BX53 microscope and DP21 digital camera (Olympus).

For immunohistochemistry, deparaffinized cardiac sections (5  $\mu$ m thick) were placed in 10 mM sodium citrate buffer (pH 6.0), boiled 20 seconds in a microwave oven, and cooled at room temperature for 20 minutes. To inactivate endogenous peroxidase, sections were incubated with 3% H<sub>2</sub>O<sub>2</sub> for 30 minutes. After incubation with TSA blocking reagent (Perkin Elmer, #FP1020)

for 30 minutes, sections were incubated with anti-PRMT1 antibody (1:200, rabbit-monoclonal, abcam, #ab92299) at room temperature for 60 minutes. Sections were then reacted with biotinylated anti-rabbit antibody (1:500, Vector, #BA1000) for 30 minutes at room temperature. Secondary antibodies were detected using the tyramide signal amplification (TSA) Plus Fluorescein System (Perkin Elmer, #NEL756001KT). For double-staining, sections were incubated with anti-cardiac troponin I antibody (1:50, rabbit-polyclonal, abcam, #ab47003) for 60 minutes at room temperature. Primary antibodies were visualized using Alexa Fluor 568 conjugated secondary antibody (Thermo Fisher Scientific, A11011). CF640R conjugated wheat germ agglutinin (WGA, Biotium, #29026) and Hoechst 33258 were used to stain cellular membranes and nuclei. Fluorescent images were obtained using a FluoView FV10i confocal laser-scanning microscope (Olympus).

### **X-gal staining**

For X-gal staining, 8-week-old mice were perfused with 4% paraformaldehyde (PFA), then the heart tissues were dissected, following immersion fixation in 4% PFA for 15 minutes. The hearts from E19 embryos were harvested and fixed with 4% PFA for 15 minutes. Tissues were then cryoprotected, embedded in O.C.T. compound, and cryostat sectioned. Sections were stained in 1xPBS containing 1 mg/ml X-gal, 5 mM  $K_4Fe(CN)_6/3H_2O$ , 5 mM  $K_3Fe(CN)_6$ , 2 mM  $MgCl_2$ , 0.05% sodium deoxycholate, and 0.02% NP-40 at 37°C overnight. Slides were then counter-stained with eosin. Data images were obtained using a BX53 microscope and DP21 digital camera (Olympus).

### **Western blotting**

Immunoblot analysis was performed as previously described (Murata et al., 2016). The primary antibodies were as follows: anti-PRMT1 (1:500-1:1000, Millipore, #07-404), anti-cardiac troponin I (1:250, Santa Cruz Biotechnology, #sc-31655), anti-vimentin (1:1000, Cell Signaling Technology, #5741), anti-GAPDH (1:2000-1:10000, American Research Products, #05-50118).

### **Cardiomyocyte isolation**

Ventricles harvested from neonatal mice were minced and enzymatically digested in HBSS (with  $Mg^{2+}$ ) containing 0.45 mg/ml collagenase type II (Worthington, #CLS2) and 0.11 mg/ml pancreatin (GIBCO, #002-0036DG) at 37°C with gentle shaking and intermittent pipetting. Cell suspension was collected and filtered through a cell strainer (40  $\mu$ m nylon mesh). The cells



were collected by centrifugation, resuspended in cardiomyocyte (CM) growth medium (DMEM/M199 (4:1) with 10% horse serum (HYCLONE, #SH30074.03), 5% fetal bovine serum (FBS), 1.6 mM L-glutamine (Life Technologies, #25030-081), 80  $\mu$ M non-essential amino acid (GIBCO, #11140-050), and penicillin-streptomycin (PS)), and plated on non-coated plastic dishes. After 2.5 hours incubation with 5% CO<sub>2</sub> at 37°C, the non-adhesive cells (cardiomyocytes) were collected, resuspended in CM growth medium containing 25  $\mu$ M cytosine  $\beta$ -D-arabinofuranoside (Ara-C, SIGMA, #C1768), and plated on gelatin-coated dishes. The remaining adhesive cells (non-myocytes) were grown in DMEM supplemented with 10% FBS and PS.

### **RNA experiments**

Cardiac RNA was extracted using mirVana miRNA Isolation Kit (Thermo Fisher Scientific, #AM1560) in accordance with the manufacturer's instructions. Large RNA fraction containing mRNA was used for gene expression assay. Reverse transcription and quantitative real-time-PCR was performed as described previously (Murata et al., 2013, Murata et al., 2016).

To validate alternative splicing events, RT-PCR was performed using AmpliTaq Gold DNA Polymerase (Thermo Fisher Scientific, #4398881) and PrimeSTAR Max DNA Polymerase (for detecting *Fbxo40* isoforms, TAKARA, #R045A). PCR products were separated by 8.5% acrylamide gel electrophoresis and stained with ethidium bromide. Images were acquired using an LAS-3000 imaging system (GE healthcare) and analyzed by ImageJ software (National Institutes of Health). Percent spliced in (PSI) value was calculated from the band intensity, as previously described (Giudice et al., 2014). The primers for RT-PCR were as follows:

*Tmed2*-forward (5'-GTACACATTTGCAGCCCACA-3')

*Tmed2*-reverse (5'-CTCCTGTTCGTGCTTTACGG-3')

*Snap23*-forward (5'-GTGTTGTGGCCTCTGCATCT-3')

*Snap23*-reverse (5'-TGGCTGCTCCTGTAGTTTGCT-3')

*Mef2a*-forward (5'-AACTCAAGGGCCTCTCCAAA-3')

*Mef2a*-reverse (5'-CACTACAGGCGTGGCAAGAG-3')

*Ktn1*-forward (5'-GATCCATGAGAAAGATGGACAGA-3')

*Ktn1*-reverse (5'-GCAGCTCCTGGACTTGAGAA-3')

*Lmo7*-forward (5'-TGAGCCAAAGTCAGCTCTCC-3')

*Lmo7*-reverse (5'-ACTTGCTCCCATTCTCACCA-3')

*Sorbs1*-forward (5'-AGACCTTCGTCTGCCTACCC-3')

*Sorbs1*-reverse (5'-GCATCCTTTGCCCTTCTCTC-3')

*Ttn* (exon 47-48)-forward (5'-CCAGGCCGAGTTGACCATCA-3')

*Ttn* (exon 47-48)-reverse (5'-GCAATGGAGGCGTGCTGATT-3')

*Ttn* (exon 48-50)-forward (5'-CAGCACGCCTCCATTGCAAG-3')

*Ttn* (exon 48-50)-reverse (5'-CAGGGATGGTCAAGACGGCA-3')

*Ttn* (exon 132-134)-forward (5'-TCGGGAGGAGGAGTATGAGG-3')

*Ttn* (exon 132-134)-reverse (5'-GGGTGGCAGAGGTTTGAGTT-3')

*Ttn* (exon 147-150)-forward (5'-GCTCCCACTCCTGTCCCTAA-3')

*Ttn* (exon 147-150)-reverse (5'-CACCTGATGAACTCCTCCAC-3')

*Asb2* (exon 6-7)-forward (5'-CAGCATCACCCCTTTGTTTG-3')

*Asb2* (exon 6-7)-reverse (5'-TCATTCTTGCTGGCCTCGT-3')

*Asb2* (extended ex6)-forward (5'-CAGCATCACCCCTTTGTTTG-3')

*Asb2* (extended ex6)-reverse (5'-CCTGGCCTAAGAGTCCTCCA-3')

*Fbxo40*-forward (5'-AGAAGCCAGAAGCAGGGAAG-3')

*Fbxo40*-reverse (5'-GCTCCACGATGTTGAAAGGA-3')

*Nrap*-forward (5'-TGTTGCTTCTCCCTGTCTCC-3')

*Nrap*-reverse (5'-GGCTGCCACAGACTTCTTCA-3')

*Eif4a2*-forward (5'-TGACGTGCAACAAGTGTCCT-3')

*Eif4a2*-reverse (5'-CCACACCTTTCCTCCCAA-3')

### **RNA sequencing**

For the preparation of cDNA library, total RNA was extracted from the heart of 6 weeks-old mice (n = 2) using ISOGEN II (Nippon Gene, #311-07361). Ribosomal RNA (rRNA) was removed using RiboMinus Eukaryote Kit (Thermo Fisher Scientific, #A1083708). Depletion of rRNA was confirmed using the Agilent 2100 Bioanalyzer (Agilent Technologies). cDNA libraries were then prepared using SOLiD total RNA-Seq kit (Thermo Fisher Scientific, #4445374) in accordance with the manufacturer's instructions. Briefly, rRNA-depleted RNA was fragmented by RNase III, and subsequently incubated with T4 polynucleotide kinase. After purification of fragmented RNA, the size of fragmented RNA was determined using the Agilent 2100 Bioanalyzer. Fragmented RNA was ligated to SOLiD adaptor, and reverse transcribed by ArrayScript reverse transcriptase (Thermo Fisher Scientific). The cDNA was purified using Agencourt AMPure XP (Beckman Coulter), and amplified by 15 cycles of PCR using SOLiD barcoded 3' primers. Amplified cDNA was purified and size-selected using Agencourt AMPure

XP. The quality of the cDNA library was checked by the Agilent 2100 Bioanalyzer, and quantified by TaqMan qPCR. RNA sequencing was carried out using the 5500xl SOLiD system (Thermo Fisher Scientific) in the single-end sequencing mode (75 bp reads) in accordance with the manufacturer's instructions.

The data were imported into CLC Genomics Workbench software (v9.5.3, Qiagen), and mapped to the mouse genome (GRCm38) using RNA-sequencing analysis tool. Transcript expression was analyzed against 83,260 transcript models downloaded from the CLC website. Quantification value for each transcript was obtained in RPKM (reads per kilobase per million reads), and used for empirical analysis of DGE in CLC Genomics Workbench. RNA isoforms were filtered based on significant expression changes ( $p < 0.05$ ) between control and PRMT1-cKO mice samples. Relative expression of isoforms between two groups was then compared by calculating isoform ratio in the following manner:

$$\text{Relative RPKM} = \text{transcript-specific RPKM} / \text{total RPKM from transcript isoforms}$$

(means of  $N=2$ , respectively)

$$\text{Isoform ratio} = \text{Relative RPKM in WT} / \text{Relative RPKM in cKO}$$

By filtering for changes at least 2.0-fold, 82 transcripts (74 genes) were selected as candidate splicing regulation events. To visually confirm these splicing events, BAM files were exported from CLC Genomics Workbench, sorted, imported to into the Integrative Genomics Viewer (IGV), and Sashimi plot images were created.

### **Data and software availability**

The accession number for the data reported in this study is GEO: GSE112938.

### **Gene ontology (GO) analysis**

GO overrepresentation test was performed using the PANTHER web tool (<http://pantherdb.org>). The gene list (74 genes) was uploaded and analyzed by statistical overrepresentation test (Fisher's Exact with FDR multiple test correction; Annotation Version and Release Date: GO Ontology database Released 2018-07-03).

### **Cell culture**

C2C12 mouse myoblasts were grown in DMEM supplemented with 10% FBS and PS (growth medium). Cell differentiation was induced by switching from growth medium to DMEM containing 2% horse serum and PS. At three days after induction of differentiation, cells were

collected and used for mRNA experiment.

### **Transfection and immunoprecipitation assay**

To investigate the function of eIF4A2 isoforms, mouse eIF4A2 isoforms were amplified by PCR from heart cDNA and inserted into pHA-C1 vector.

The primers for cDNA cloning were as follows:

XhoI-eIF4A2-forward (5'-CCGCTCGAGCTATGTCTGGTGGCTCCGCGGA-3')

eIF4A2-wt-BamHI-reverse (5'-CGCGGATCCTTAAATTAGGTCAGCCACAT-3')

eIF4A2-tr-BamHI-reverse (5'-CGCGGATCCCTATCGACTCCTGTGAATAT-3')

For detecting ubiquitination, plasmids were transfected into C2C12 cells using Lipofectamine LTX (Thermo Fisher Scientific, #5338100) in accordance with the manufacturer's instructions. After 16 hours incubation, cells were treated with MG132 (10  $\mu$ M final concentration, Enzo Life Sciences, #BML-PI102-0005) for 8 hours. Cells were lysed in ice-cold TNE buffer containing 0.1% Triton X-100. After centrifugation, the supernatants were incubated overnight with anti-HA antibody (Roche, #11867423001) at 4°C. To collect the immunocomplex, SureBeads Protein G Magnetic Beads (Bio-Rad, #1614023) were added to samples. After incubation for 1 hour at 4°C, the beads were washed three times with lysis buffer, 2xSDS sample buffer was added, and incubated for 5 minutes at 99°C. Immunoblot was performed using following primary antibodies: anti-HA (1:2000, mouse-monoclonal, Wako, #014-21881), anti-ubiquitin (1:500, mouse-monoclonal, Santa Cruz Biotechnology, #sc-8017), anti- $\beta$ -actin (1:2000, rabbit-polyclonal, Medical & Biological Laboratory, #PM053).

### **Statistical analysis**

Statistical analysis was performed using GraphPad Prism 5 (GraphPad Prism Software). The data were analyzed using Student's *t*-test and Mann Whitney test, and two-way ANOVA followed by Bonferroni multiple comparison test. Significant differences were defined as  $p < 0.05$ .

### **Supplemental references**

Mi, H., Muruganujan, A., Casagrande, J.T., and Thomas, P.D. (2013). Large-scale gene function analysis with the PANTHER classification system. *Nat. Protoc.* 8, 1551-1566.

Murata, K., Ishida, J., Ishimaru, T., Mizukami, H., Hamada, J., Saito, C., and Fukamizu, A. (2016). Lactation Is a Risk Factor of Postpartum Heart Failure in Mice with Cardiomyocyte-specific Apelin Receptor (APJ) Overexpression. *J. Biol. Chem.* 291, 11241-11251.

Murata, K., Saito, C., Ishida, J., Hamada, J., Sugiyama, F., Yagami, K., and Fukamizu, A. (2013). Effect of lactation on postpartum cardiac function of pregnancy-associated hypertensive mice. *Endocrinology* 154, 597-602.
